# Supplementary material
Source: MDPI journal article supplement (https://www.mdpi.com/2673-4060/3/4/53)
Supplement: s1 [file s1]

Archive with 1 entries (1 files):
- world-2014793-supplementary.pdf
